# Supplementary material for: Facile synthesis of a WOx/CsyWO3 heterostructured composite as a visible light photocatalyst
Source: Royal Society of Chemistry journal article supplement (doi:10.1039/c7ra12355h), 2018-01-01
Supplement: c7ra12355h1.pdf [file c7ra12355h1.pdf]

## SUPPORTING INFORMATION

### Facile synthesis of $WO_x/Cs_yWO_3$ heterostructured composite as a visible light photocatalyst

N. Tahmasebi<sup>a\*</sup>, S. Madmoli<sup>a</sup>

<sup>a</sup>Jundi-Shapur University of technology, Dezful, Iran

\*Correspondence to: tahmasebi@jsu.ac.ir

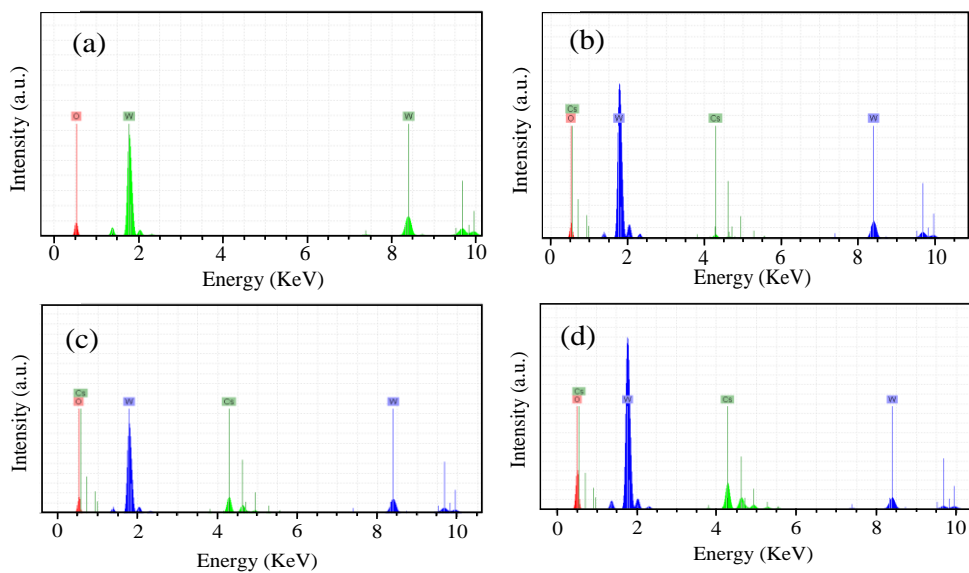

**Fig. S1** EDS patterns of synthesized samples with initial cesium to tungsten molar ration ( $A=Cs/W$ ) of (a)  $A=0.00$ , (b)  $0.10$ , (c)  $0.30$ , and (d)  $0.66$ .

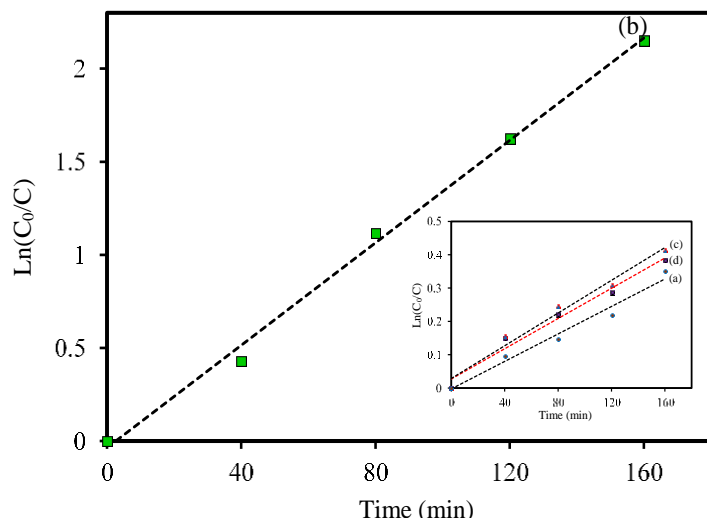

**Fig. S2.** Photodegradation rate constant of synthesized samples with initial cesium to tungsten molar ratio ( $A=Cs/W$ ) of (a)  $A=0.00$ , (b)  $0.10$ , (c)  $0.30$ , and (d)  $0.66$ .

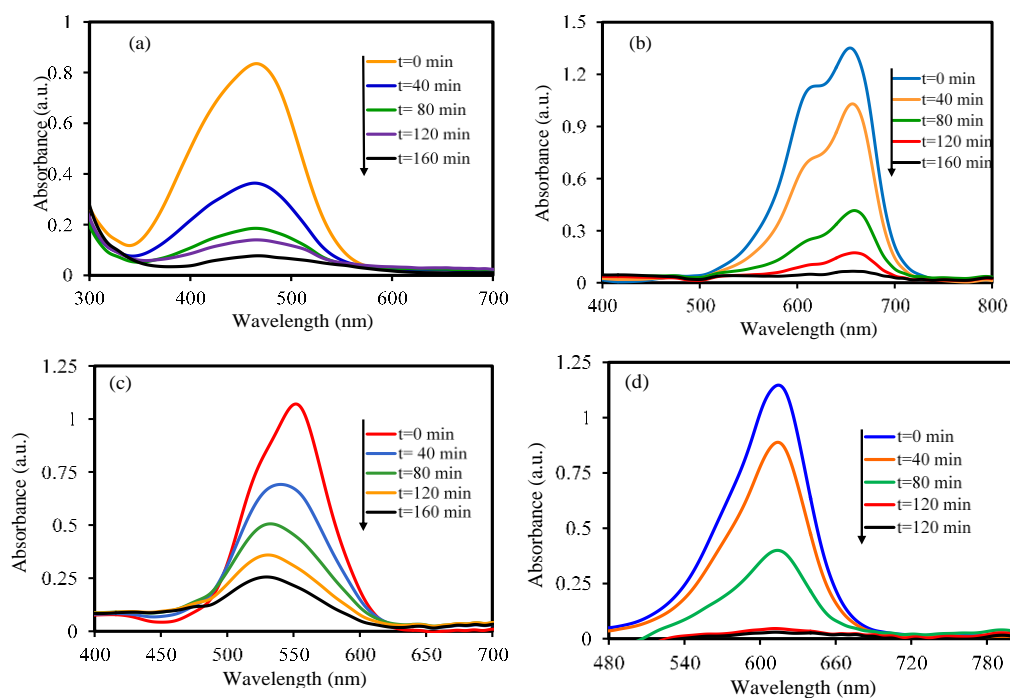

**Fig. S3** The temporal evolution of UV-Vis absorption spectra of (a) MO, (b) MB, (c) RhB, and (d) MG in the presence of  $WO_x/Cs_yWO_3$  composite under visible light (LED 30 W) irradiation.

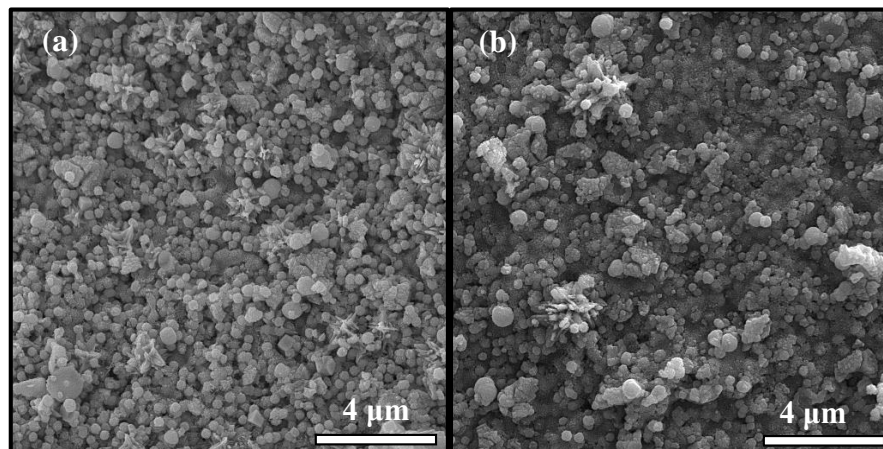

**Fig. S4** SEM image of  $\text{WO}_x/\text{Cs}_y\text{WO}_3$  composite (a) before and (b) after photocatalytic degradation of RhB solution under visible light irradiation.

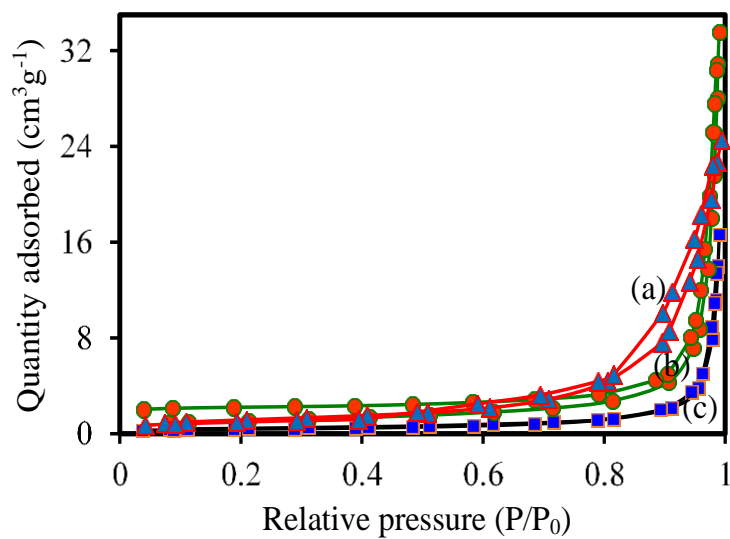

**Fig. 5** Nitrogen adsorption-desorption isotherm curves of (a)  $\text{WO}_{2.83}$ , (b)  $\text{WO}_x/\text{Cs}_y\text{WO}_3$ , and (c)  $\text{Cs}_{0.3}\text{WO}_3$ .

**Table S1.** BET surface area, pore volume and pore diameter of different samples

| Sample                               | BET Surface area<br>( $\text{m}^2\text{g}^{-1}$ ) | Total pore volume<br>( $\text{cm}^3\text{g}^{-1}$ ) | Mean pore diameter<br>(nm) |
|--------------------------------------|---------------------------------------------------|-----------------------------------------------------|----------------------------|
| $\text{WO}_{2.83}$                   | 3.99                                              | 0.036                                               | 36.47                      |
| $\text{WO}_x/\text{Cs}_y\text{WO}_3$ | 3.75                                              | 0.051                                               | 54.95                      |
| $\text{Cs}_{0.3}\text{WO}_3$         | 1.53                                              | 0.025                                               | 66.65                      |

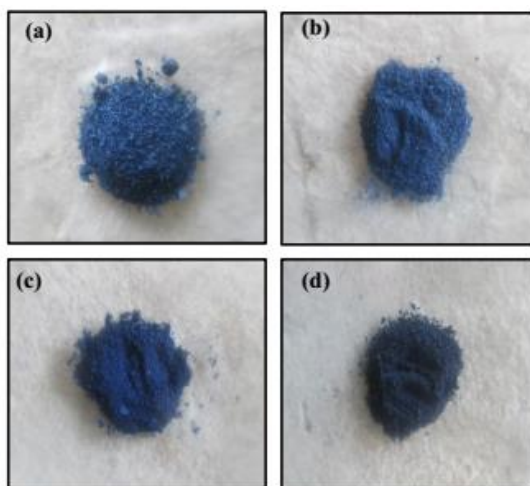

**Fig. S6** The photograph image of (a)  $\text{WO}_{2.83}$ , (b)  $\text{WO}_x/\text{Cs}_y\text{WO}_3$  composite, (c)  $\text{Cs}_{0.32}\text{WO}_3$ , and (d)  $\text{Cs}_{0.50}\text{WO}_3$  samples.
